# Supplementary material for: Syntheses, characterization, multi-acid fluorescence sensing and electroluminescence properties of Cr(ii)-based metallopolymers
Source: Royal Society of Chemistry journal article supplement (doi:10.1039/d0py00953a), 2020-01-01
Supplement: d0py00953a1.pdf [file d0py00953a1.pdf]

## Supporting Information

### Syntheses, Characterization and Multi-Acids Fluorescent Sensing and Electroluminescent Properties of Cr(II)-based Metallopolymers

Anil Kumar<sup>a</sup>, Shubham Bawa<sup>a</sup>, Kapil Ganorkar<sup>b</sup>, Sujit Kumar Ghosh<sup>b</sup>, Anasuya Bandyopadhyay<sup>a\*</sup>

<sup>a</sup>Department of Polymer and Process Engineering, IIT Roorkee Saharanpur Campus, Saharanpur-247001, India

<sup>b</sup>Department of Chemistry, Visvesvaraya National Institute of Technology, Nagpur, Maharashtra-440010, India.

E-mail: anasuya.bandyopadhyay@pe.iitr.ac.in

#### List of Contents

- 1- Molecular Weight of Cr(II)-RNL poly and Cr(II)-FNL poly
- 2- ATR-IR Studies of Cr(II)-RNL poly and Cr(II)-FNL poly
- 3- MM<sub>2</sub> energy minimization of Cr(II)-RNL poly and Cr(II)-FNL poly
- 4- XRD Studies of Cr(II)-RNL poly and Cr(II)-FNL poly
- 5- <sup>1</sup>H-NMR Studies of Cr(II)-RNL poly and Cr(II)-FNL poly with different Acids
- 6- Conductivity of Cr(II)-RNL poly and Cr(II)-FNL poly solutions in methanol
- 7- Strength of used acid
- 8- Sensing of acids in the complex medium
- 9- Fluorescence lifetime data
- 10- Cyclic Voltammetry data of ligands (RNL and FNL)
- 11- Cyclic Voltammogram of Cr(II)-RNL poly and Cr(II)-RNL poly with different acid
- 12- Spectroelectrochemistry of Cr(II)-RNL poly and Cr(II)-FNL poly

#### 1-Molecular Weight of Cr(II)-RNL poly and Cr(II)-FNL poly

The Weight Average molecular weight of the Cr(II)-RNL poly, Cr(II)-RNL poly was determined by Static light scattering (SLS) with the help of Berry plot. For this, two different stock solutions were prepared for both of the polymer samples by dissolving 12 mg of polymer in 24 ml of THF solvent. These stock solutions were filtered through a 0.2 micron Nylon filter to remove solid particles, if any, to obtain a homogeneous solution. Then six different concentration solutions were prepared from this stock solution with filtered THF solvent used as dilution, and both the polymers were analyzed at different angles by SLS technique gives the  $(3.93 \pm 0.10) \times 10^4$  g/ mol for Cr(II)-RNL poly (Fig-S-1) and  $(5.62 \pm 0.10) \times 10^4$  g/ mol for Cr(II)-RNL Poly (Fig-S-2) shown in Berry plot.

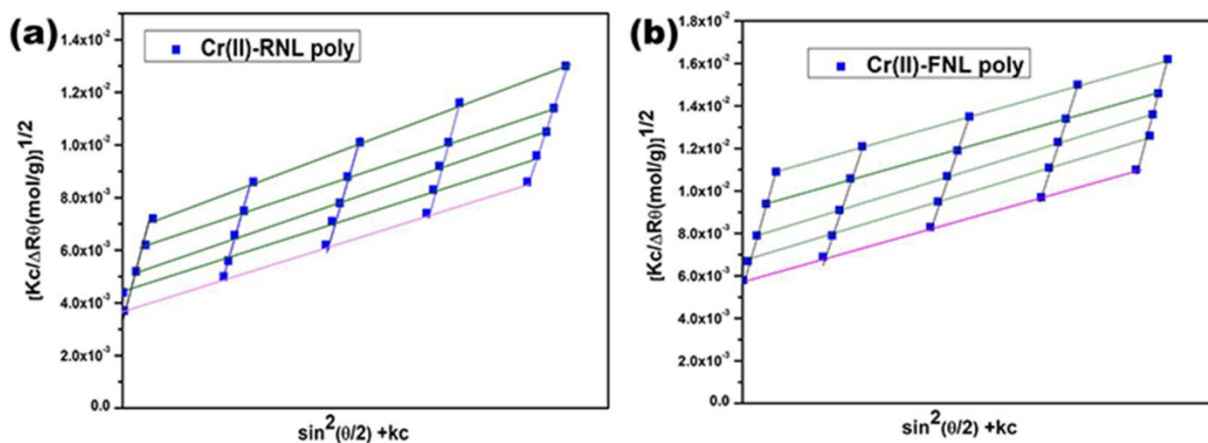

**Figure S1.** Berry Plot of (a) Cr(II)-RNL poly and (b) Cr(II)-FNL poly in batch mode with a solution prepared in THF

## 2-ATR-IR Studies of Cr(II)-RNL poly and Cr(II)-FNL poly

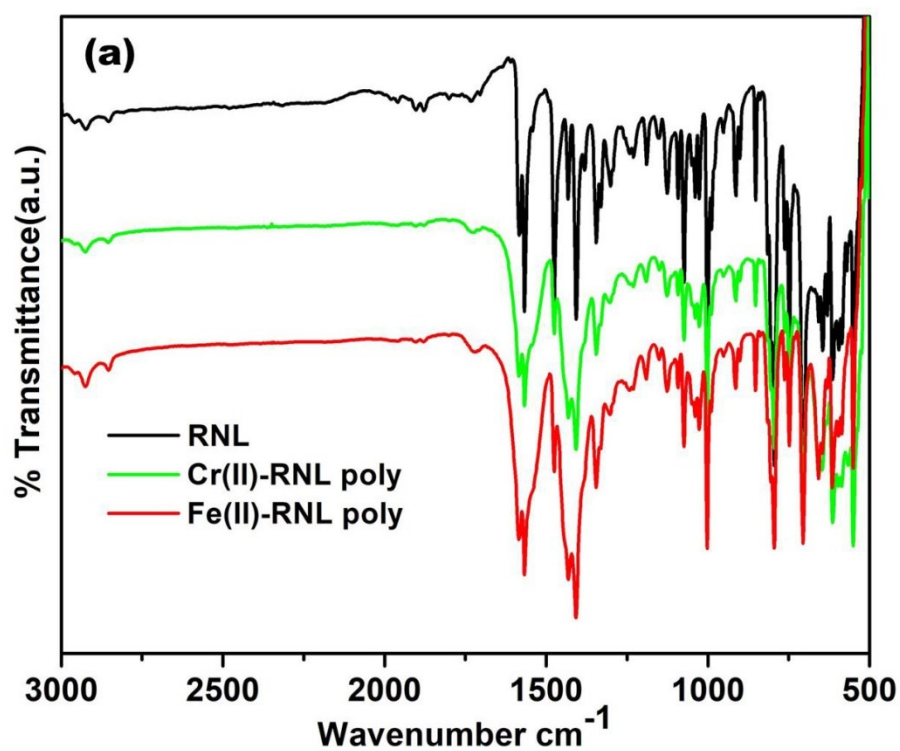

**Figure S2.** (a) Overlaid ATR-IR spectra of RNL and Cr(II)-RNL poly with Fe(II)-RNL poly

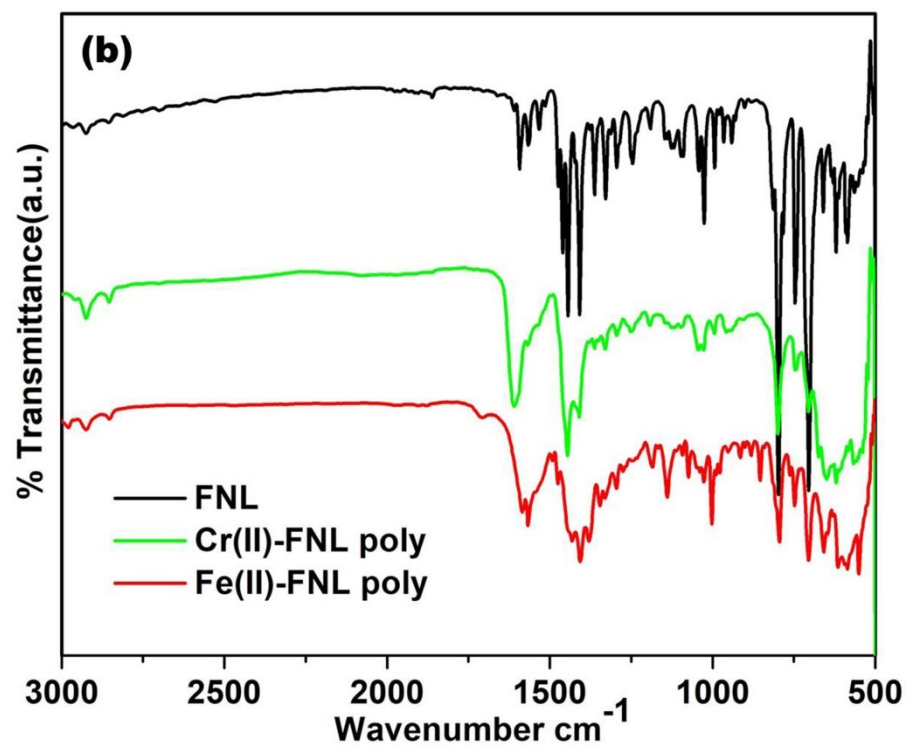

**Figure S2.** (b) Overlaid ATR-IR spectra of FNL and Cr(II)-FNL poly with Fe(II)-FNL poly

3-MM<sub>2</sub> energy minimizations of Cr(II)-RNL poly and Cr(II)-FNL poly

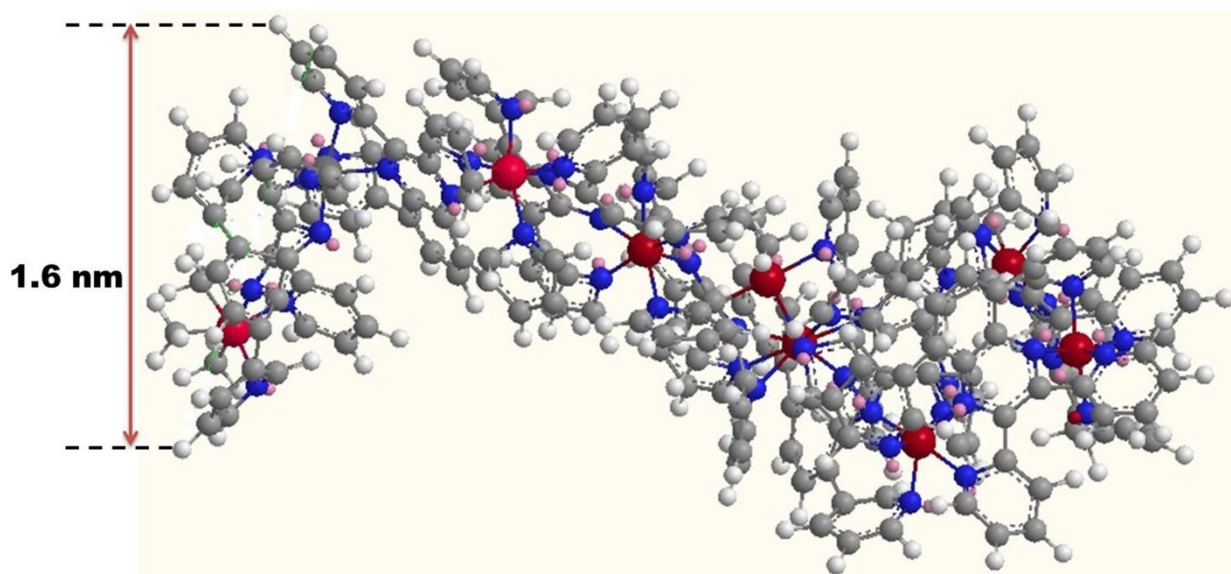

**Figure S3.** Reduced structure of Cr(II)-RNL poly 8 units in the polymer chains and its thickness measurements

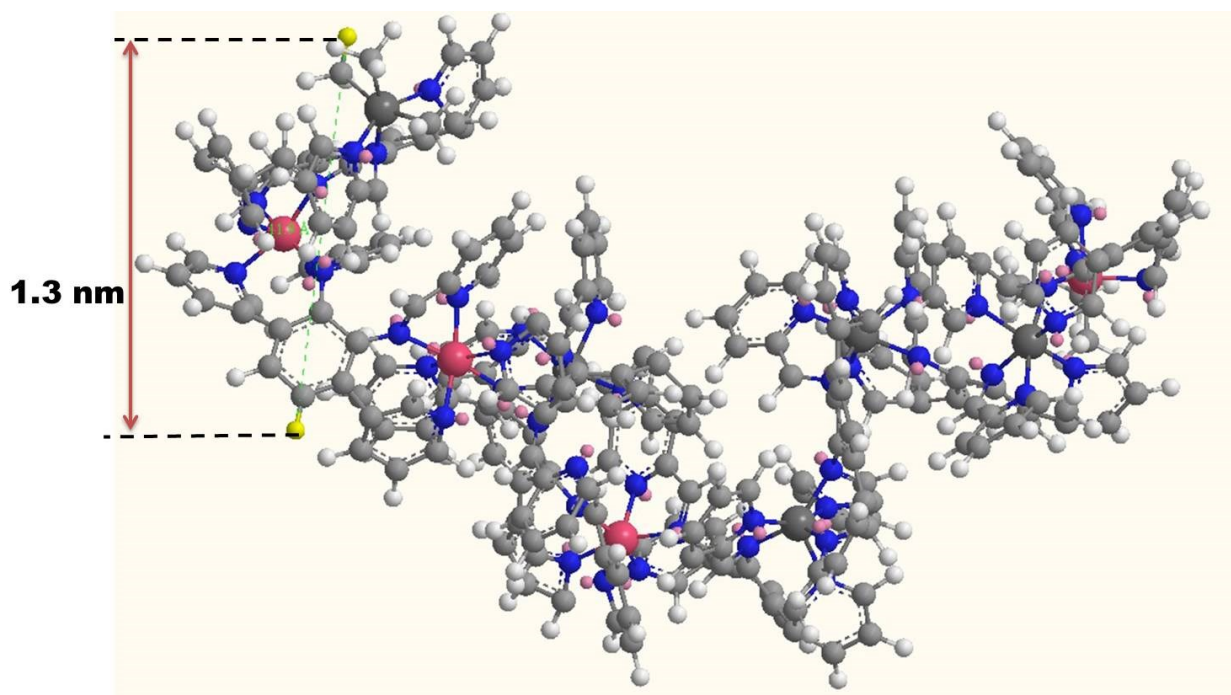

**Figure S4.** Reduced structure of Cr(II)-FNL poly 8 units in the polymer chains and its thickness measurements

#### 4- XRD Studies of Cr(II)-RNL poly and Cr(II)-FNL poly

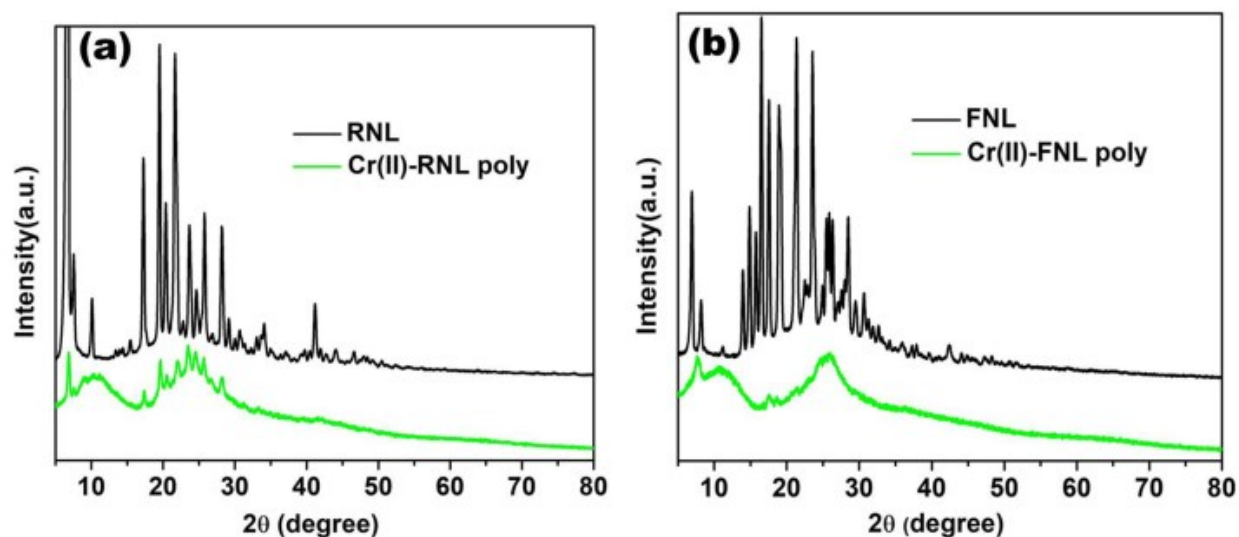

**Figure S5.** XRD graph of RNL and Cr(II)-RNL poly (b) XRD graph of FNL and Cr(II)-FNL poly

### 5- $^1\text{H}$ -NMR Studies of Cr(II)-RNL poly and Cr(II)-FNL poly with different Acids

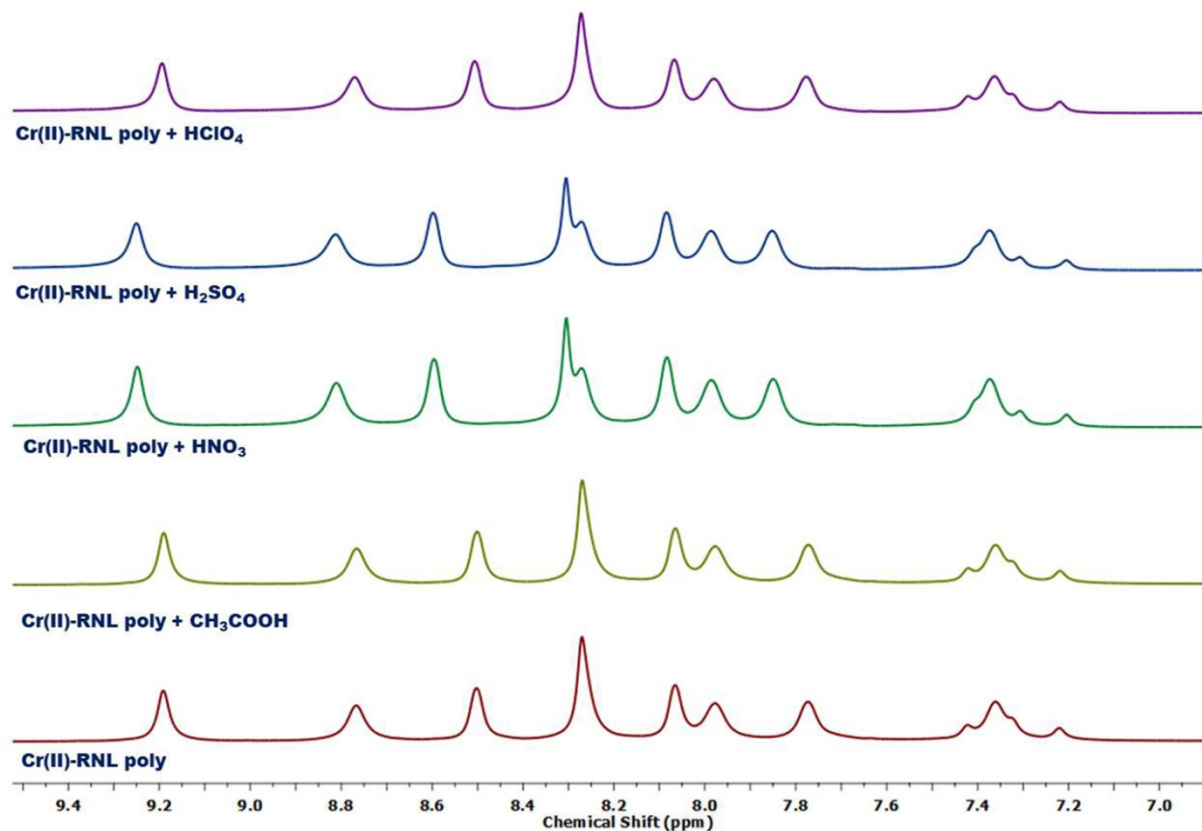

**Figure S6.** Overlaid  $^1\text{H}$ -NMR spectrum of Cr(II)-RNL poly with different acids in  $\text{DMSO-d}_6$

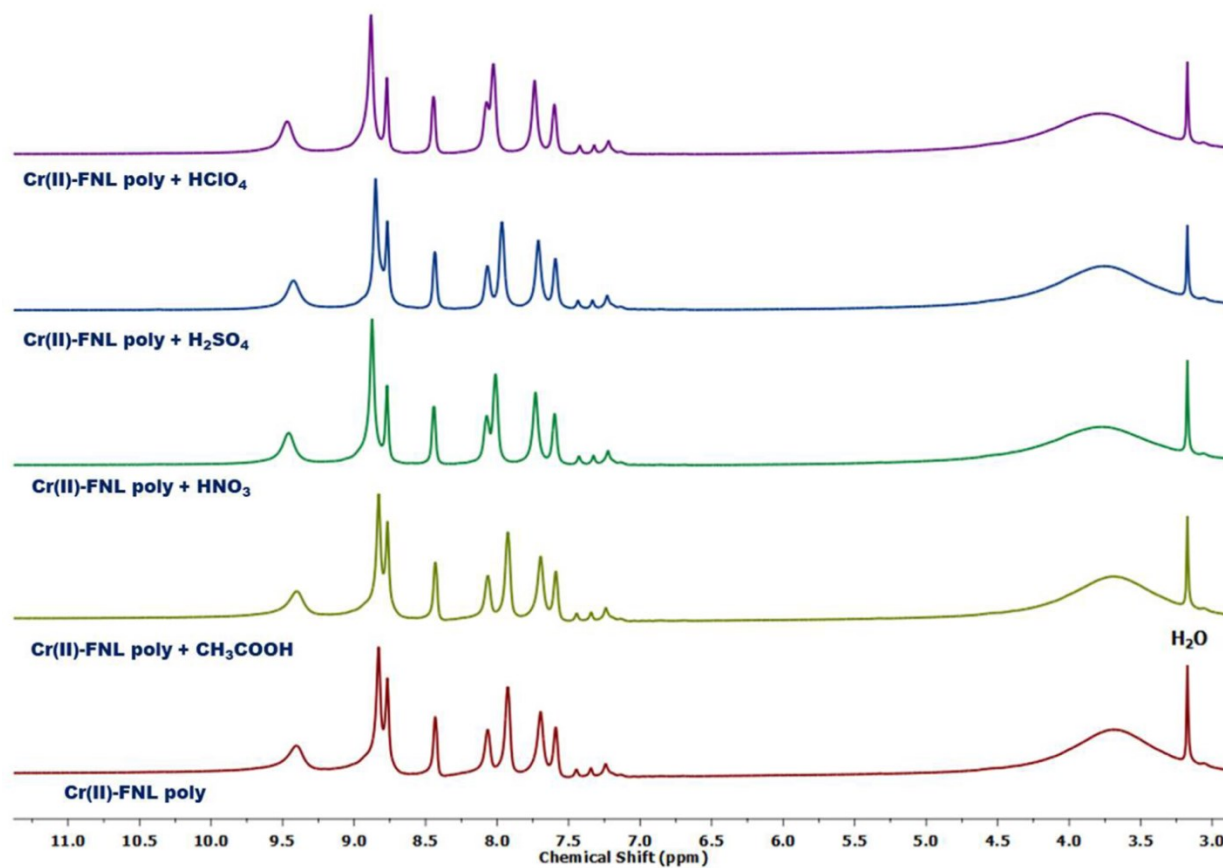

**Figure S7.** Overlaid  $^1\text{H}$ -NMR spectrum of Cr(II)-FNL poly with different acids in DMSO- $\text{d}_6$

## 6- Conductivity of Cr(II)-RNL poly and Cr(II)-FNL poly solutions in Methanol

**Table-S-1.** Conductivity of Cr(II)-RNL poly and Cr(II)-FNL poly solutions in Methanol

| Sr No. | Concentration (M)      | Cr(II)-RNL poly (Conductivity $\mu\text{S}$ ) | Cr(II)-FNL poly (Conductivity $\mu\text{S}$ ) |
|--------|------------------------|-----------------------------------------------|-----------------------------------------------|
| 1      | $\text{CH}_3\text{OH}$ | 1.37                                          | 1.37                                          |
| 2      | $10^{-2}$              | 574                                           | 666                                           |
| 3      | $10^{-3}$              | 86                                            | 102                                           |
| 4      | $10^{-4}$              | 10.02                                         | 50                                            |
| 5      | $10^{-5}$              | 2.75                                          | 10.11                                         |



## 7- Strength of Used Acid

Table-S-2. Strength of Acid after dilution in 2  $\mu$ l

| S. No. | Acid                           | Strength of Used Acid | Strength of Acid after dilution in 2 $\mu$ l |
|--------|--------------------------------|-----------------------|----------------------------------------------|
| 1      | CH <sub>3</sub> COOH           | 17.39 M               | $1.73 \times 10^{-2}$ M                      |
| 2      | HNO <sub>3</sub>               | 15.8 M                | $1.58 \times 10^{-2}$ M                      |
| 3      | H <sub>2</sub> SO <sub>4</sub> | 18.4 M                | $1.84 \times 10^{-2}$ M                      |
| 4      | HClO <sub>4</sub>              | 11.56 M               | $1.15 \times 10^{-2}$ M                      |

## 8- Sensing of acids in the complex medium

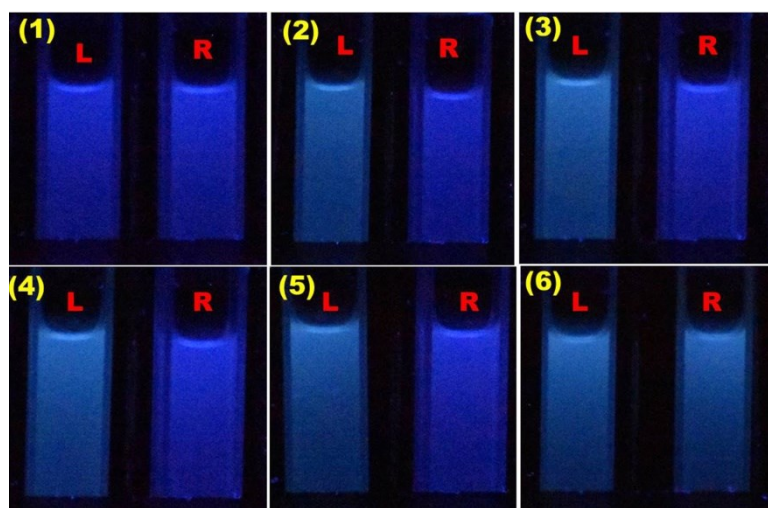

**Figure S8.** Sensing ability of Cr(II)-RNL poly solution in complex medium

**Image 1.** L-Polymer Solution (Blank): R- Polymer Solution (Blank), **Image 2.** L -Polymer Solution + 2  $\mu$ l ( $4 \times 10^{-4}$  M) H<sub>2</sub>SO<sub>4</sub> : R- Polymer Solution (Blank), **Image 3.** L-Polymer Solution + 2  $\mu$ l ( $4 \times 10^{-4}$  M) H<sub>2</sub>SO<sub>4</sub> : R-( $10^{-3}$  M Glucose), **Image 4.** L-Polymer Solution + 2  $\mu$ l ( $4 \times 10^{-4}$  M) H<sub>2</sub>SO<sub>4</sub> : R-( $10^{-3}$  M Glucose +  $10^{-3}$  M Picric Acid), **Image 5.** L-Polymer Solution + 2  $\mu$ l ( $4 \times 10^{-4}$  M) H<sub>2</sub>SO<sub>4</sub> : R-( $10^{-3}$  M Glucose +  $10^{-3}$  M Picric Acid +  $10^{-3}$  M Starch), **Image 6.** L-Polymer Solution + 2  $\mu$ l ( $4 \times 10^{-4}$  M) H<sub>2</sub>SO<sub>4</sub> : R- ( $10^{-3}$  M Glucose+  $10^{-3}$  M Picric Acid +  $10^{-3}$  M Starch + 2  $\mu$ l ( $4 \times 10^{-4}$  M) H<sub>2</sub>SO<sub>4</sub>

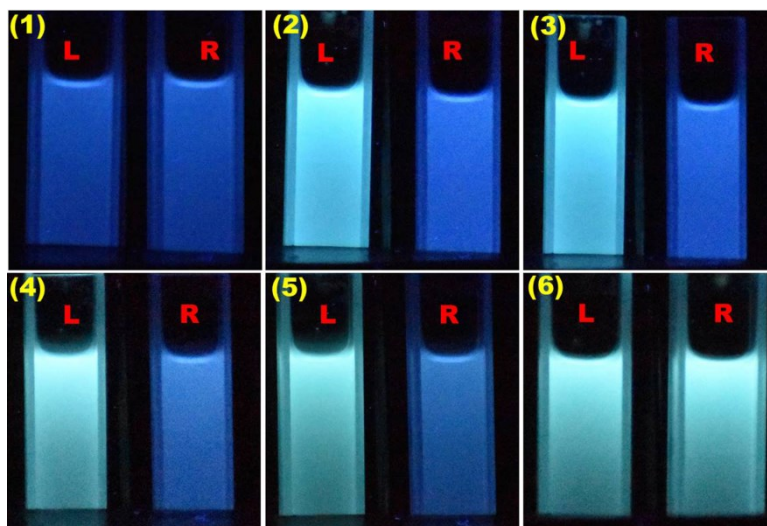

**Figure S9.** Sensing ability of Cr(II)-FNL poly solution in complex medium

**Image 1.** L-Polymer Solution (Blank): R- Polymer Solution (Blank), **Image 2.** L -Polymer Solution + 2  $\mu\text{l}$  ( $4 \times 10^{-4}$  M)  $\text{H}_2\text{SO}_4$  : R-Polymer Solution (Blank), **Image 3.** L-Polymer Solution + 2  $\mu\text{l}$  ( $4 \times 10^{-4}$  M)  $\text{H}_2\text{SO}_4$  : R-( $10^{-3}$  M Glucose), **Image 4.** L-Polymer Solution + 2  $\mu\text{l}$  ( $4 \times 10^{-4}$  M)  $\text{H}_2\text{SO}_4$  : R-( $10^{-3}$  M Glucose +  $10^{-3}$  M Picric Acid), **Image 5.** L-Polymer Solution + 2  $\mu\text{l}$  ( $4 \times 10^{-4}$  M)  $\text{H}_2\text{SO}_4$  : R-( $10^{-3}$  M Glucose +  $10^{-3}$  M Picric Acid +  $10^{-3}$  M Starch)**Image 6.** L-Polymer Solution + 2  $\mu\text{l}$  ( $4 \times 10^{-4}$  M)  $\text{H}_2\text{SO}_4$  : R-( $10^{-3}$  M Glucose+  $10^{-3}$  M Picric Acid +  $10^{-3}$  M Starch + 2  $\mu\text{l}$  ( $4 \times 10^{-4}$  M)  $\text{H}_2\text{SO}_4$

We have done above experiment by adding one after another chemical to check whether our developed metallopolymer is sensing them or it exclusively senses only acid protons. We have introduced first glucose, followed by picric acid and then starch (all of them contain hydroxyl protons) to see whether they are sensed by metallopolymer or not but it did not show any sensing property to hydroxyl protons and thus confirmed that it can only sense acidic protons (Acetic, Sulphuric, Nitric, Perchloric). Fluorescence change was observed in polymer solution containing all other added chemicals only after addition of 2  $\mu\text{l}$  ( $4 \times 10^{-4}$  M)  $\text{H}_2\text{SO}_4$ .



## 9- Fluorescence lifetime Data

**Table-S-3. The fluorescence lifetime of Cr(II)-RNL and Cr(II)-FNL poly with different acids in methanol**

| Sample                                           | $\lambda_{em}$<br>(nm) | $\chi^2$ | $\tau_1$<br>(ns) | $\alpha_1$ (%) | $\tau_2$ (ns) | $\alpha_2$ (%) | Average<br>Lifetime<br>(ns) |
|--------------------------------------------------|------------------------|----------|------------------|----------------|---------------|----------------|-----------------------------|
| RNL                                              | 435                    | 1.00     | 0.79             | 73.39          | 1.99          | 26.30          | 1.10                        |
| Cr(II)-RNL poly                                  | 435                    | 0.94     | 1.13             | 90.17          | 1.94          | 9.83           | 1.21                        |
| Cr(II)-RNL poly + CH <sub>3</sub> COOH           | 435                    | 0.93     | 1.25             | 90.68          | 2.07          | 9.32           | 1.32                        |
| Cr(II)-RNL poly + HNO <sub>3</sub>               | 434                    | 0.98     | 1.20             | 98.82          | 3.08          | 1.18           | 1.22                        |
| Cr(II)-RNL poly + H <sub>2</sub> SO <sub>4</sub> | 437                    | 1.40     | 1.21             | 92.46          | 4.90          | 7.54           | 1.48                        |
| Cr(II)-RNL poly + HClO <sub>4</sub>              | 436                    | 1.44     | 1.24             | 96.29          | 4.49          | 3.71           | 1.36                        |
| FNL                                              | 409                    | 0.98     | 0.93             | 55.83          | 2.02          | 44.57          | 1.41                        |
| Cr(II)-FNL poly                                  | 434                    | 0.95     | 1.18             | 64.27          | 2.49          | 35.73          | 1.64                        |
| Cr(II)-FNL poly +CH <sub>3</sub> COOH            | 434                    | 0.99     | 1.23             | 71.40          | 2.53          | 28.60          | 1.60                        |
| Cr(II)-FNL poly + HNO <sub>3</sub>               | 472                    | 1.08     | 1.81             | 83.13          | 5.74          | 16.87          | 1.94                        |
| Cr(II)-FNL poly + H <sub>2</sub> SO <sub>4</sub> | 471                    | 1.34     | 1.82             | 31.04          | 7.00          | 68.95          | 5.39                        |
| Cr(II)-FNL poly + HClO <sub>4</sub>              | 473                    | 1.24     | 2.15             | 44.60          | 6.67          | 55.40          | 4.65                        |

## 10- Cyclic Voltammetry data of ligands (RNL and FNL)

Table-S-4. Cyclic Voltammetry data of ligands

| Compound | Reduction potential $-E_{1/2}$ V |
|----------|----------------------------------|
| RNL      | -1.40 , -0.42                    |
| FNL      | -1.30, -0.81, -0.35              |

## 11- Cyclic voltammogram of (a) Cr(II)-RNL poly and (b) Cr(II)-RNL poly with different acid

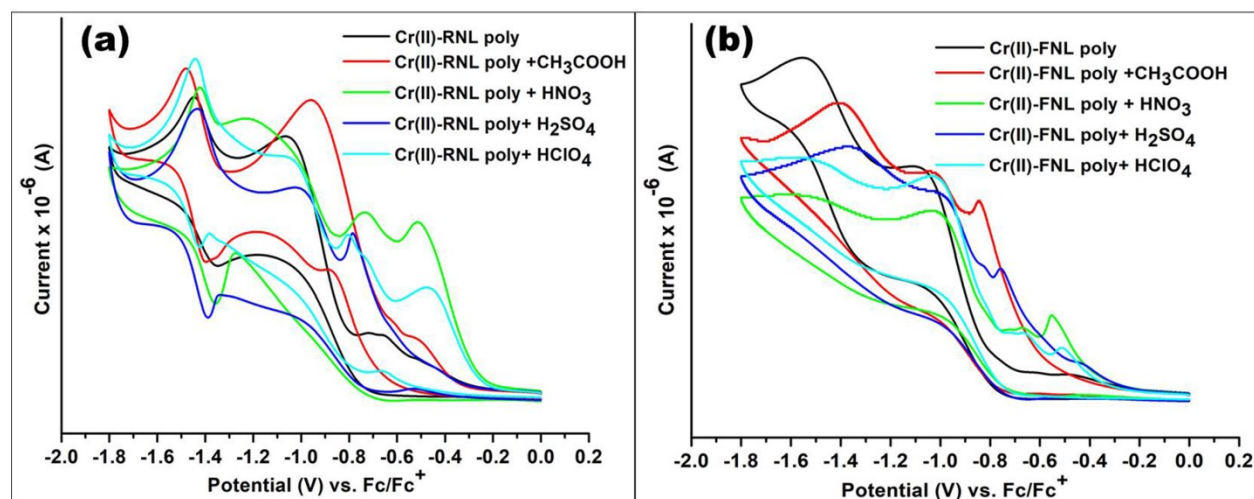

**Figure S10.** Cyclic voltammogram of (a) Cr(II)-RNL poly and (b) Cr(II)-RNL-poly in dichloromethane with different acids containing 0.1 M TBAP at 100mV/s with Glassy Carbon working electrode

## 12- Spectroelectrochemistry of Cr(II)-RNL poly and Cr(II)-FNL poly

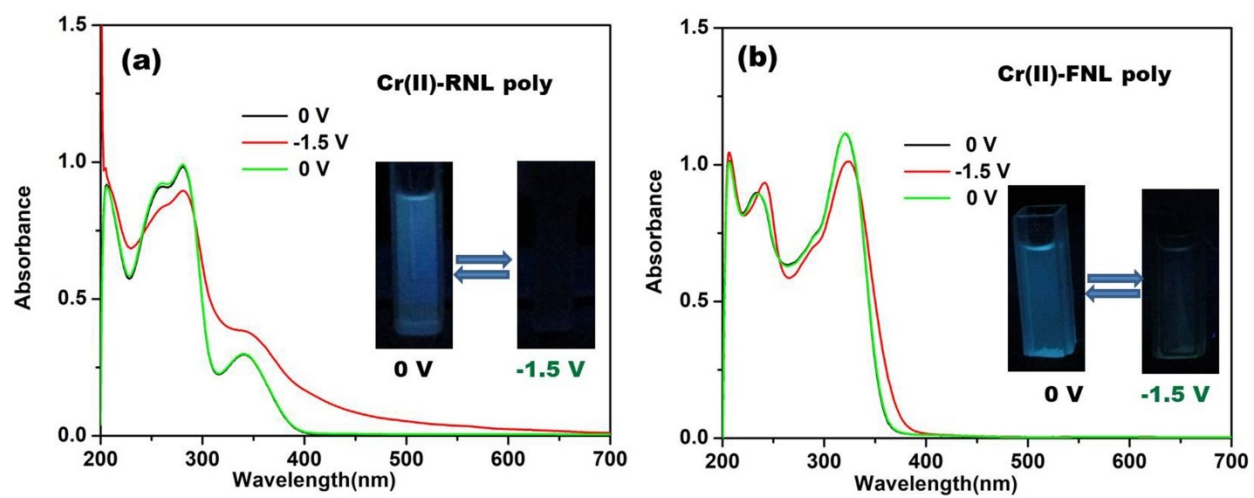

**Figure S11.** Reversible Spectroelectrochemical spectra of (a) Cr(II)-RNL poly (b) Cr(II)-FNL poly in DCM
